# Supplementary material for: Hypoxia-activated prodrug and antiangiogenic therapies cooperatively treat pancreatic cancer but elicit immunosuppressive G-MDSC infiltration
Source: JCI journal article supplement (doi:10.1172/jci.insight.169150), 2023-11-21
Supplement: sd1 [file 1]

Supplementary Figures and Legends  
JCI Insight (Revisions 2023) – Arthur Liu *et al.*

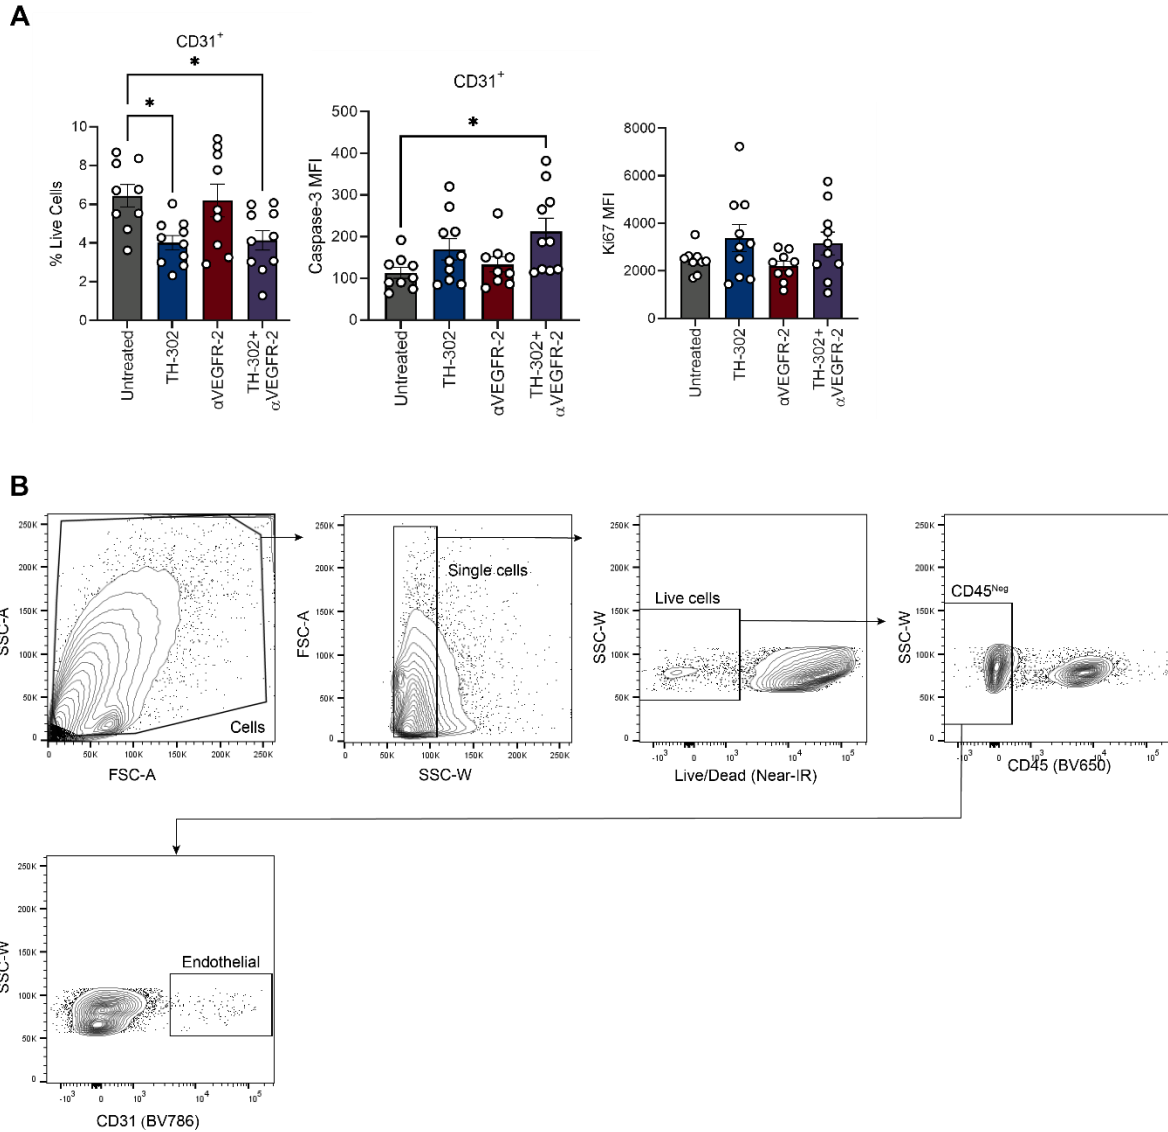

**Supplementary Figure 1. Combination TH-302 and  $\alpha$ VEGFR-2 results in endothelial cell pruning.** 10-day established MT4-LA tumors were treated for five consecutive days of TH-302 and two doses of  $\alpha$ VEGFR-2 prior to resection and processing for flow cytometry analysis. For endothelial cell analysis, the pellet fraction from the Ficoll density gradient separation was collected. **(A)** CD31<sup>+</sup> cells were assessed for their total frequency and expression of Active Caspase-3 and Ki67 ( $n = 9-10$  mice per group). **(B)** Representative gating strategy for CD31<sup>+</sup> endothelial cells. One-way ANOVA followed by Tukey's correction for multiple comparisons. \* $P$   $adj < 0.05$ , \*\* $P$   $adj < 0.01$ , \*\*\* $P$   $adj < 0.001$ , \*\*\*\* $P$   $adj < 0.0001$ .

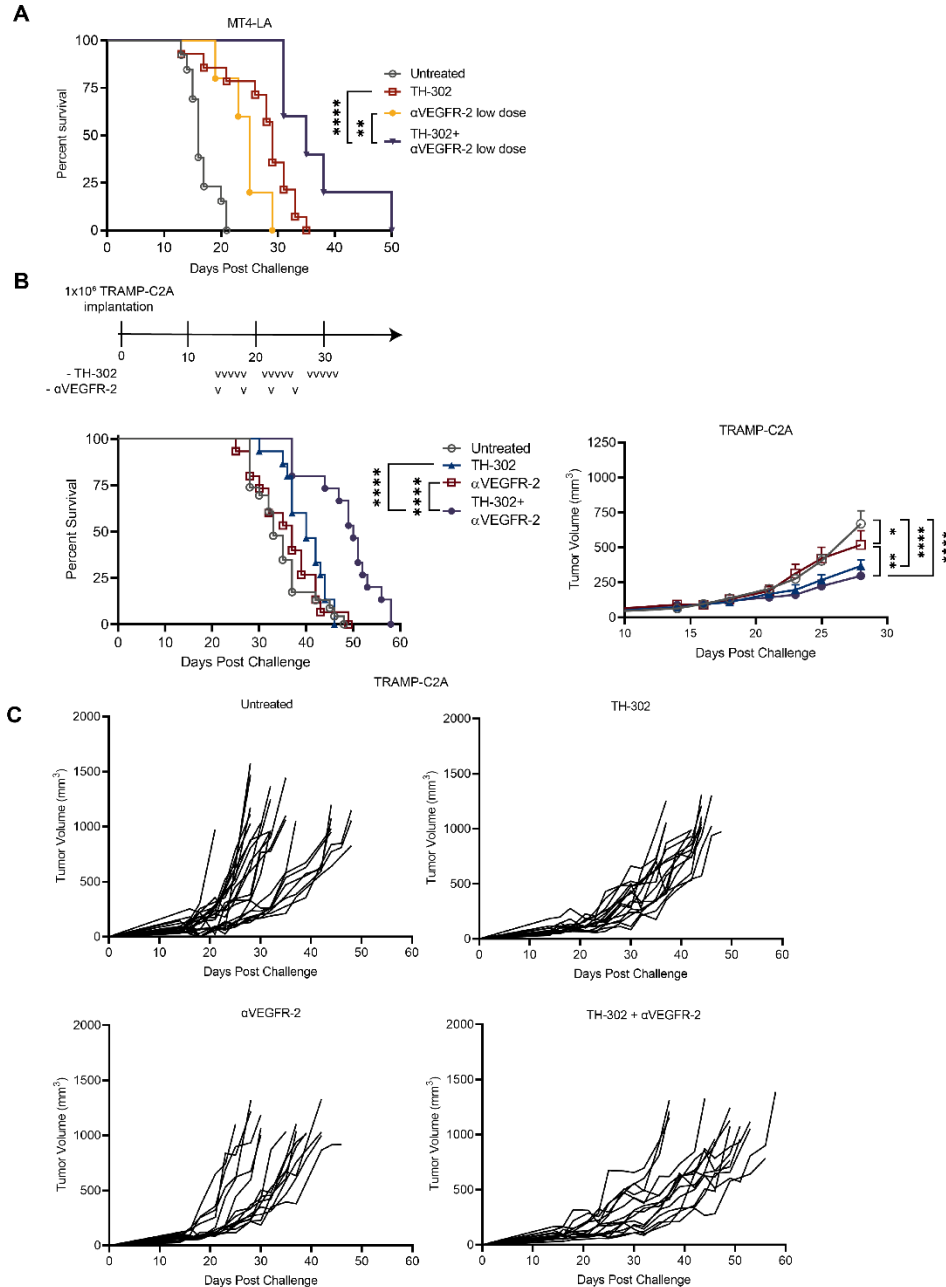

**Supplementary Figure 2. Low dose  $\alpha$ VEGFR-2 treatment of orthotopic pancreatic tumors and survival of mice challenged with TRAMP-C2A tumors.** (A) Survival of mice treated with 10 mg/kg  $\alpha$ VEGFR-2 ( $n = 5-10$  mice per group). Untreated and TH-302 treated mice data is first presented in Figure 2. (B) Mice bearing 14-day pre-implanted subcutaneous TRAMP-C2A prostate tumors were treated as described and monitored for survival and tumor growth ( $n = 15-23$  mice per group). (C) Individual tumor growth curves of TRAMP-C2A shown in (B). Log-rank (Mantel-Cox) test for survival and two-way ANOVA followed by Tukey's correction for multiple comparisons for tumor growth. \* $P_{adj} < 0.05$ , \*\* $P_{adj} < 0.01$ , \*\*\* $P_{adj} < 0.001$ , \*\*\*\* $P_{adj} < 0.0001$ ; data are mean  $\pm$  SEM.

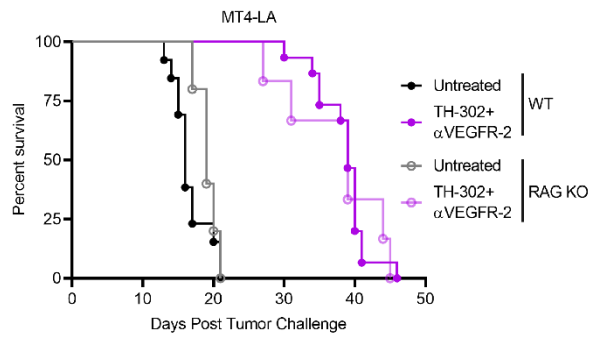

**Supplementary Figure 3.** Combination TH-302 and VEGFR2 blockade is not dependent on the adaptive immune response. 10 day established MT4-LA tumors in wild type or *Rag*-knockout mice were treated with TH-302 and VEGFR-2 as described in Figure 2 (n = 5-15 per group. Wild type mouse data is first presented in Figure 2. Log-rank (Mantel-Cox) test for survival. \**P* *adj* < 0.05, \*\**P* *adj* < 0.01, \*\*\**P* *adj* < 0.001, \*\*\*\**P* *adj* < 0.0001; data are mean ± SEM.

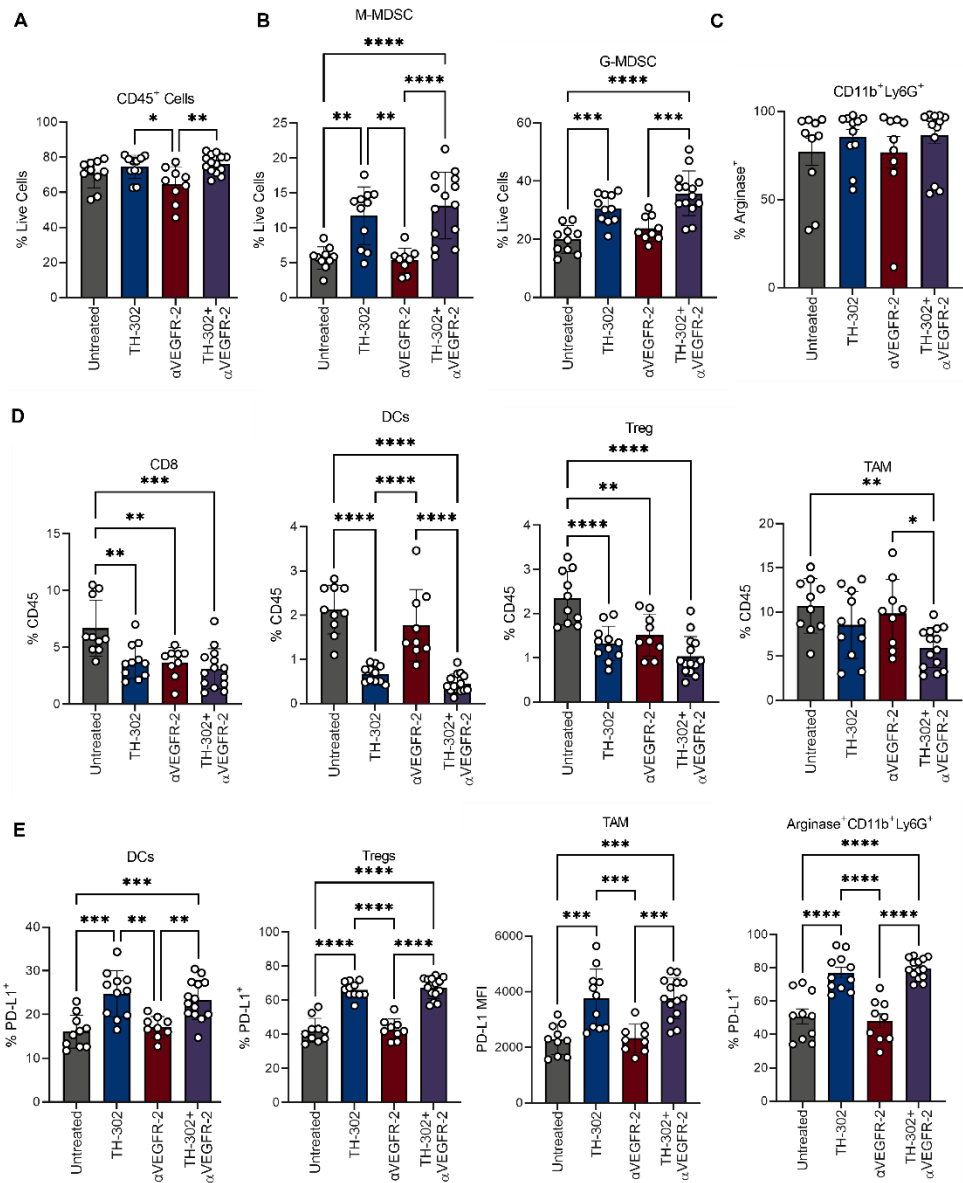

**Supplementary Figure 4. Effect of TH-302 and VEGFR-2 blockade on tumor infiltrating immune cells.** 10-day established MT4-LA tumors were treated for five consecutive days of TH-302 and two doses of VEGFR-2 blockade prior to resection for flow cytometry analysis. **(A)** Percent of live, CD45<sup>+</sup> cells. **(B)** Percentage of live, M-MDSC and G-MDSC. **(C)** Proportion of Ly6G positive cells that express Arginase 1. **(D)** Proportion of CD8 T cells, dendritic cells (DCs), CD4 T regulatory cells (Treg), and tumor associated macrophages (TAMs). **(E)** Frequency of PD-L1 expressing DCs, Tregs, and TAMs **(A-E)** n = 10-14 per group. One-way ANOVA followed by Tukey's correction for multiple comparisons. \**P* *adj* < 0.05, \*\**P* *adj* < 0.01, \*\*\**P* *adj* < 0.001, \*\*\*\**P* *adj* < 0.0001; data are mean ± SEM.

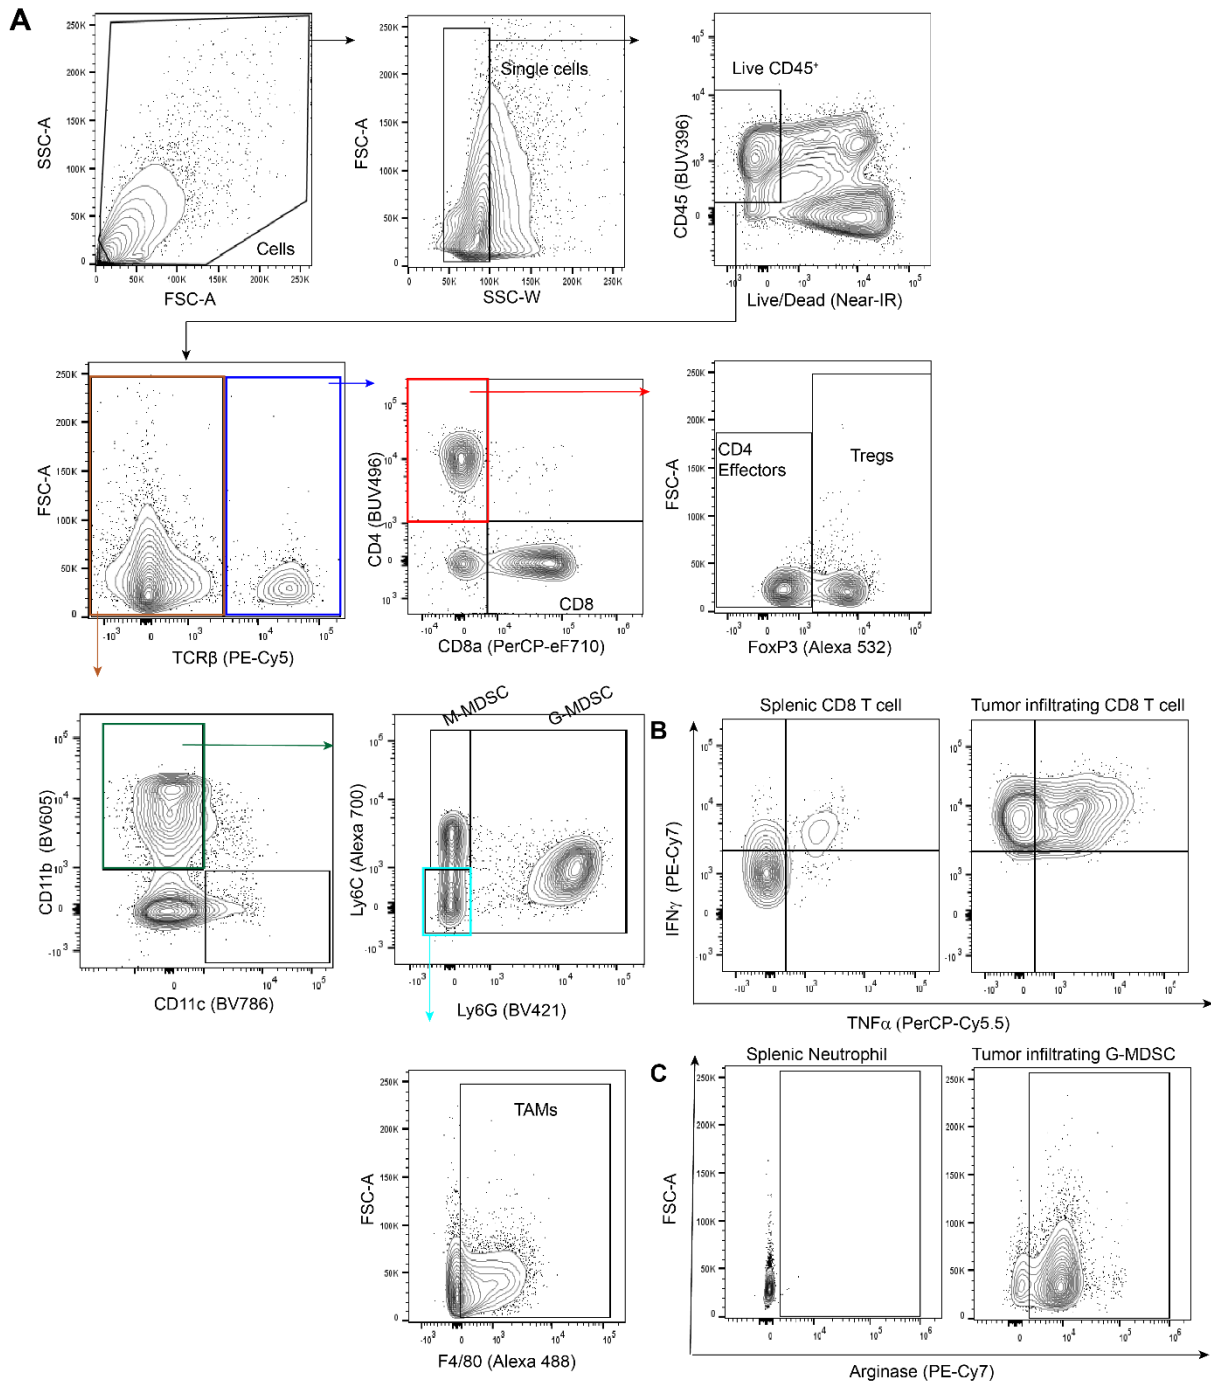

**Supplementary Figure 5. Tumor infiltrating immune cell gating schema. (A)** Representative gating for live, tumor infiltrating immune cells and representative gating for **(B)** dual expressing IFN $\gamma$  and TNF $\alpha$  T cells and **(C)** arginase gating on Ly6G<sup>+</sup> cells.

**A**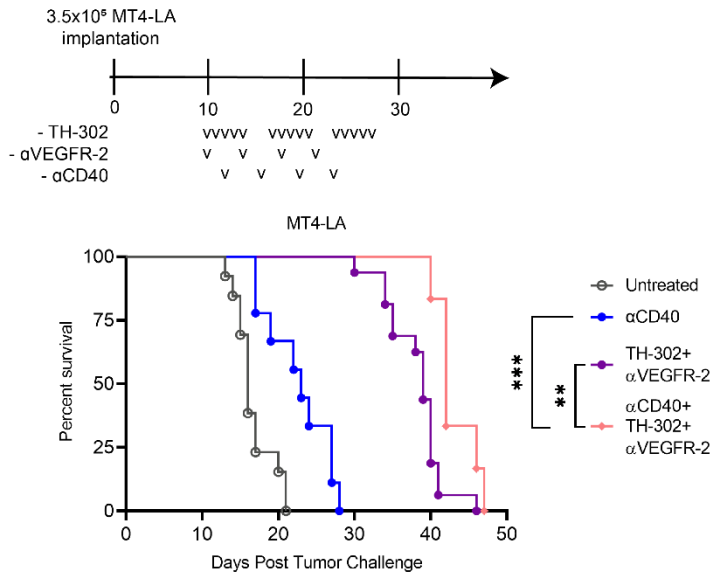**B**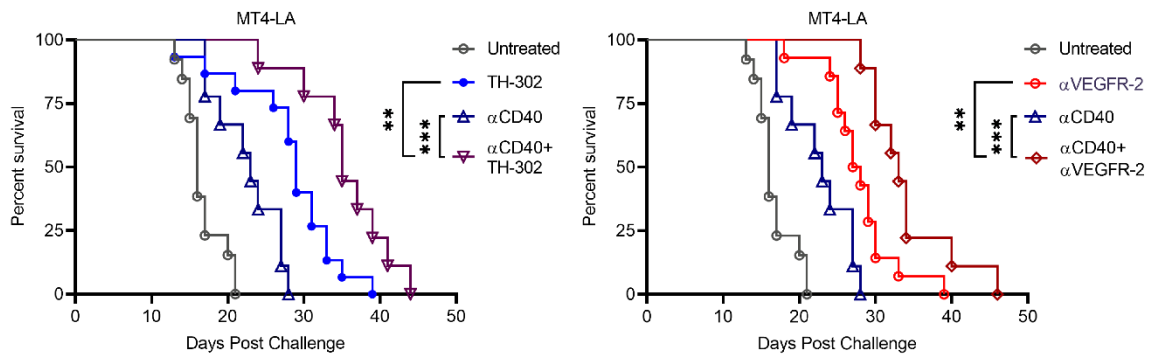

**Supplementary Figure 6. αCD40 provides an additive benefit when combined with either TH-302 or αVEGFR-2.** (A) αCD40 used in combination with TH-302 and αVEGFR-2 or (B) with each monotherapy ( $n = 9-15$  mice per group). αCD40 survival curves presented in (B) are the same but presented in two separate graphs for clarity. Untreated and TH-302 treated mice are first presented in Figure 2. Log-rank (Mantel-Cox) test. \* $P_{adj} < 0.05$ , \*\* $P_{adj} < 0.01$ , \*\*\* $P_{adj} < 0.001$ , \*\*\*\* $P_{adj} < 0.0001$ ; data are mean  $\pm$  SEM.

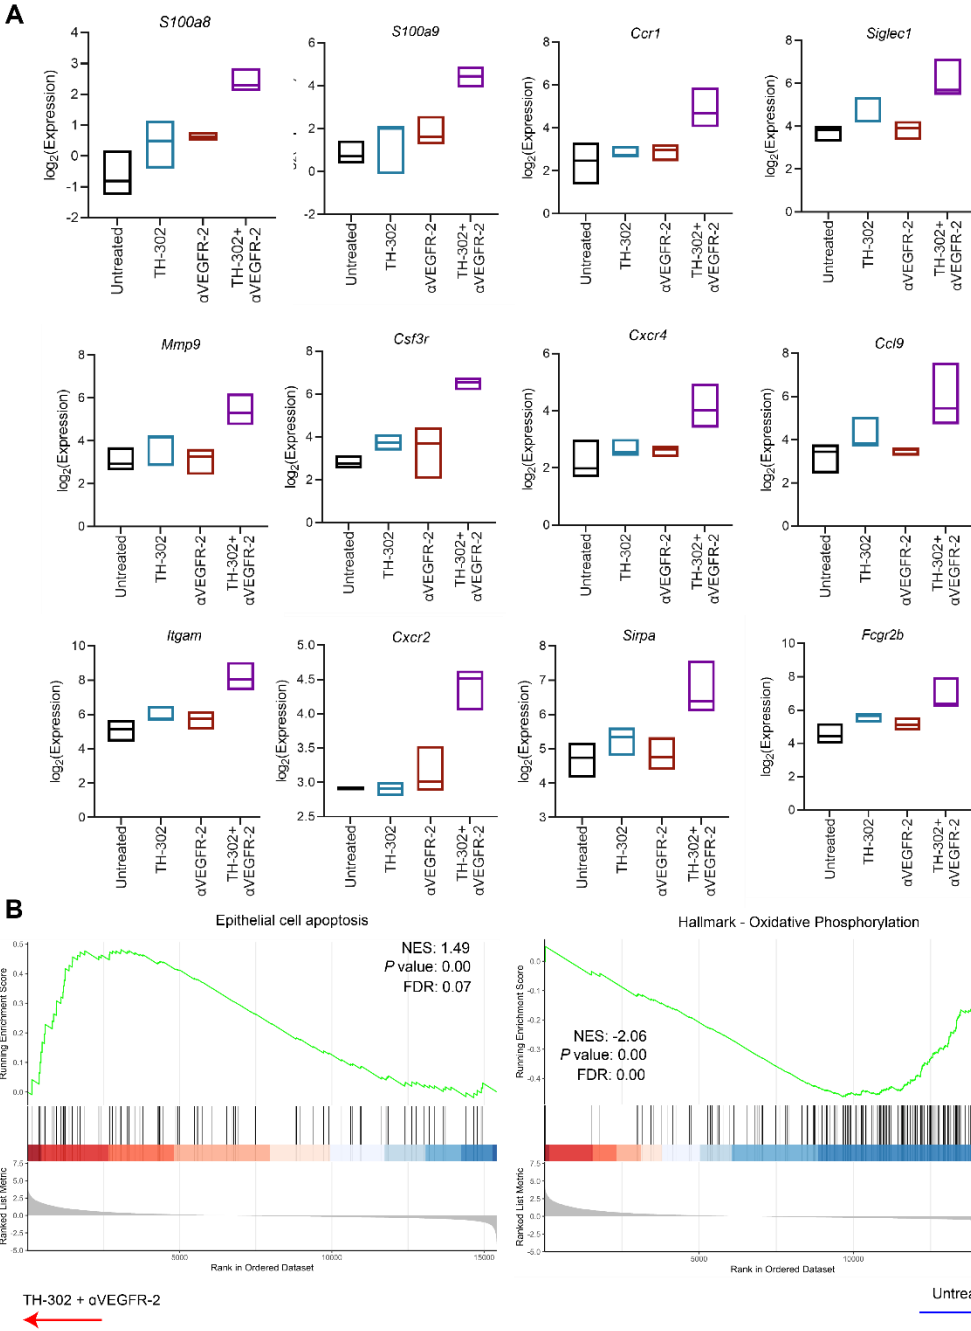

**Supplementary Figure 7. Normalized expression levels of selected neutrophil-related genes expressed in treated tumors. (A) Genes enriched in combination treated tumors over untreated. (B) Leading edge analysis of epithelial cell apoptosis and hallmark oxidative phosphorylation ( $n = 3$  mice per group). NES, normalized enrichment score. FDR, false discovery rate.**



**A**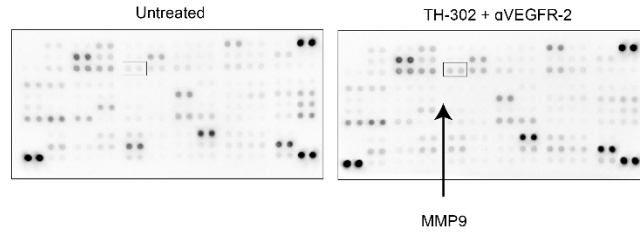**B**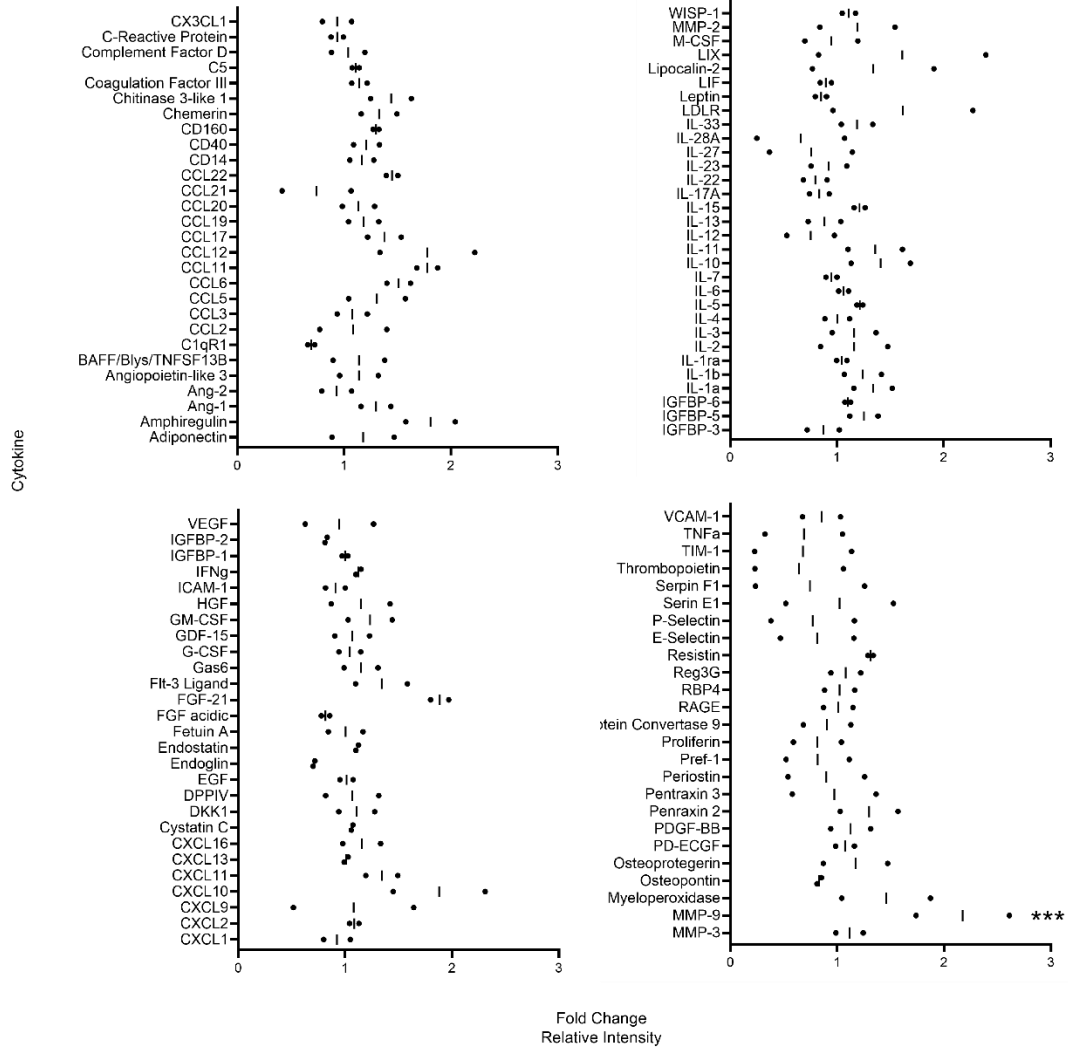

**Supplementary Figure 8. MMP9 is enriched in combination TH-302 and αVEGFR-2 treated tumors.** (A) Representative proteome Profiler Mouse XL Cytokine Array membranes and (B) associated quantification ( $n = 2-3$  pooled tumors per group, 2 independent experiments). One-way ANOVA followed by Tukey's correction for multiple comparisons.  $*P_{adj} < 0.05$ ,  $**P_{adj} < 0.01$ ,  $***P_{adj} < 0.001$ ,  $****P_{adj} < 0.0001$ ; data are mean  $\pm$  SEM.

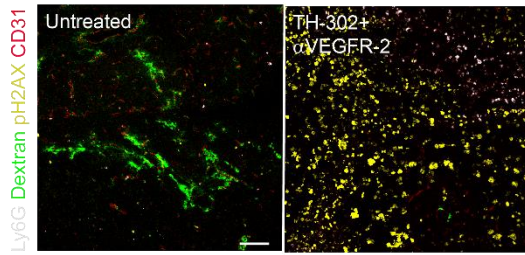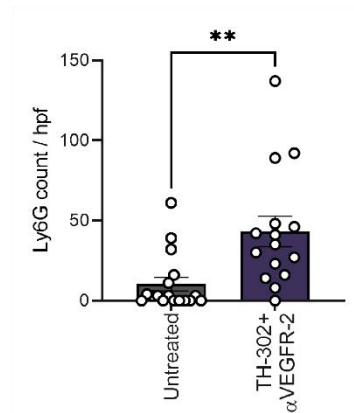

**Supplementary Figure 9. Quantification of Ly6G positive cells in the tumor microenvironment.**

Left: Mice with untreated tumors or those that received one cycle of TH-302 and  $\alpha$ VEGFR-2 treatment were injected with dextran prior to sacrifice. Tumors were resected, embedded in OCT for sectioning. Slides were stained with antibodies against Ly6G, pH2AX, and CD31. Right: Quantification of Ly6G counts per high power field. Unpaired two-tailed Student's *t* test. \**P* adj < 0.05, \*\**P* adj < 0.01, \*\*\**P* adj < 0.001, \*\*\*\**P* adj < 0.0001; data are mean  $\pm$  SEM.

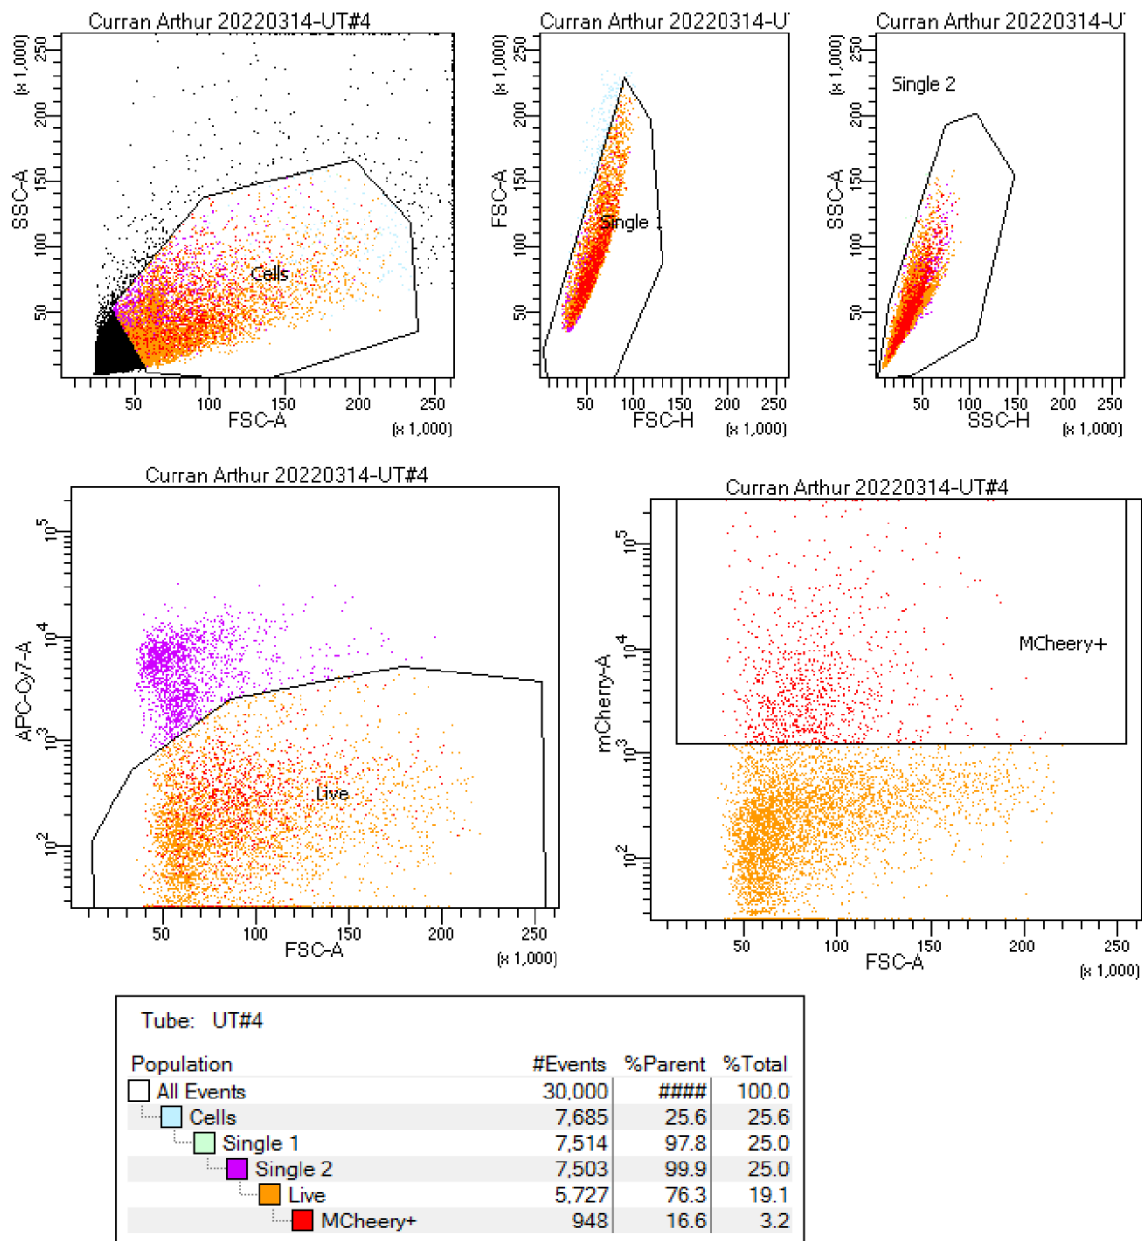

**Supplementary Figure 10. Gating scheme for sorting mCherry positive pancreatic tumor cells for RNA extraction.** Implanted pancreatic tumors were treated and processed as described in Figure 6 and Methods section before fluorescence-activated cell sorting on a BD FACSaria

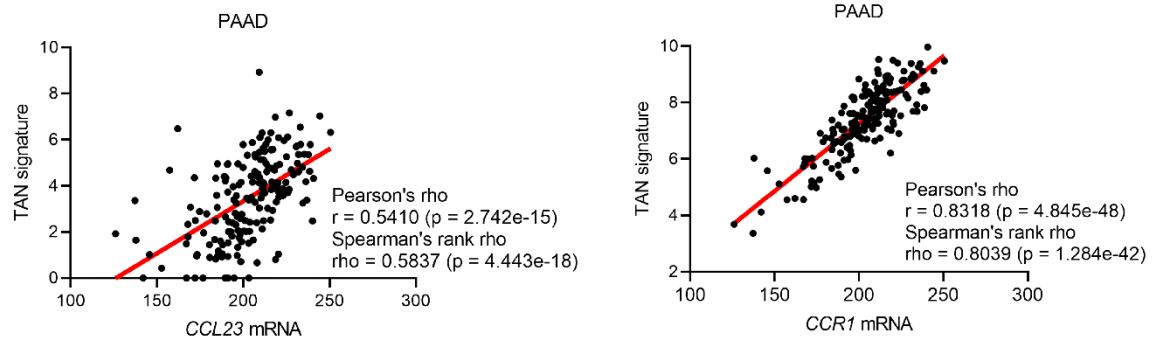

**Supplementary Figure 11. Pearson's rho correlation between a TAN gene signature and *CCL23* or *CCR1* transcript in The Cancer Genome Atlas pancreatic adenocarcinoma (PAAD) dataset ( $n = 183$ ).**

**Supplementary Table 1.** List of antibodies and reagents used for flow cytometry and immunofluorescence

| <b>REAGENT or RESOURCE</b>                                                              | <b>SOURCE</b>             | <b>IDENTIFIER</b> |
|-----------------------------------------------------------------------------------------|---------------------------|-------------------|
| <b>Flow cytometry</b>                                                                   |                           |                   |
| CD45.2 – clone 104                                                                      | BD Biosciences            | 564616            |
| CD4 – clone GK1.5                                                                       | BD Biosciences            | 612952            |
| PD-1 – clone RMP1-30                                                                    | BD Biosciences            | 748267            |
| LAG-3 – clone C9B7W                                                                     | BioLegend                 | 125227            |
| CD11c – clone HL3                                                                       | BD Biosciences            | 563735            |
| Ly6G – clone 1A8                                                                        | BD Biosciences            | 562737            |
| Ki67 – clone B56                                                                        | BD Biosciences            | 563462            |
| CD11b – clone M1/70                                                                     | BD Biosciences            | 563015            |
| IA/IE – clone M5/114                                                                    | BD Biosciences            | 563415            |
| F4/80 – clone BM8                                                                       | Invitrogen                | MF48020           |
| CD8a – clone SK1                                                                        | Invitrogen                | 46-0087-42        |
| FoxP3 – clone FJK-16s                                                                   | Invitrogen                | 58-5773-82        |
| Tox – clone REA473                                                                      | Miltenyi Biotec           | 130-120-716       |
| TCRbeta – clone H57-597                                                                 | Invitrogen                | 15-5961-82        |
| Arginase – clone A1exF5                                                                 | Invitrogen                | 25-3697-82        |
| Active Caspase-3 – clone C92-605                                                        | BD Biosciences            | 564094            |
| Ly6C – clone AL-21                                                                      | BD Biosciences            | 561237            |
| Near-IR Live/Dead                                                                       | Invitrogen                | L34975            |
| CD31 – clone 390                                                                        | BioLegend                 | 102435            |
| PD-L1 – clone MIH5                                                                      | BD Biosciences            | 563369            |
| CCR1 – clone S15040E                                                                    | BioLegend                 | 152507            |
| CXCR4 – clone 2B11                                                                      | BD Biosciences            | 551966            |
| CXCR2 – clone V48-2310                                                                  | BD Biosciences            | 747812            |
| CSF3R – clone N/A                                                                       | R&D Systems               | FAB6039G          |
| IFN $\gamma$ - clone XMG1.2                                                             | Invitrogen                | 25-7311-41        |
| Sirp $\alpha$ - clone P84                                                               | Invitrogen                | 25-1721-82        |
| TNF $\alpha$ - clone MP6-XT22                                                           | BioLegend                 | 506321            |
| <b>Immunofluorescence</b>                                                               |                           |                   |
| Anti-pimonidazole – clone 4.3.11.3                                                      | Hypoxyprobe               | HP6-1000Kit       |
| DAPI – clone N/A                                                                        | Invitrogen                | D1306             |
| CD31 – clone 390                                                                        | BD Biosciences            | 563608            |
| Ki67 – clone D3B5                                                                       | Cell Signaling Technology | 9129              |
| NG2 – clone N/A                                                                         | Millipore                 | AB5320            |
| pH2AX (Ser139) – clone 20E3                                                             | Cell Signaling Technology | 9718              |
| Ly6G – clone 1A8                                                                        | BD Biosciences            | 562737            |
| Donkey anti-Rabbit IgG (H+L) Highly Cross-Adsorbed Secondary Antibody, Alexa Fluor™ 488 | Thermo Fisher Scientific  | A-21206           |

|                                                                                        |                           |        |
|----------------------------------------------------------------------------------------|---------------------------|--------|
| Goat anti-Rat IgG (H+L) Highly Cross-Adsorbed Secondary Antibody, Alexa Fluor Plus 405 | Thermo Fisher Scientific  | A48261 |
| Cleaved Caspase-3 (Asp175) Antibody #9661                                              | Cell Signaling Technology | 9661S  |

sSupplementary Table 2. List of critical resources and reagents

| <b>REAGENT or RESOURCE</b>                                                                          | <b>SOURCE</b>             | <b>IDENTIFIER</b> |
|-----------------------------------------------------------------------------------------------------|---------------------------|-------------------|
| Fetal Bovine Serum                                                                                  | Gibco                     | 26140079          |
| DMEM                                                                                                | Gibco                     | 11995065          |
| Penicillin-Streptomycin                                                                             | Thermo Fisher Scientific  | 15140122          |
| Polybrene                                                                                           | Sigma-Aldrich             | #TR-1003-G        |
| Corning® Matrigel® Growth Factor Reduced (GFR) Basement Membrane Matrix, Phenol Red-free, LDEV-free | Corning                   | 356231            |
| Insulin solution from bovine pancreas                                                               | Sigma-Aldrich             | I0516-5ML         |
| Standard Insulin Syringe with Needle EasyTouch™ 0.5 mL 1/2 Inch 29 Gauge NonSafety Thin Wall        | MHC Medical               | 829555            |
| Phosphate Buffered Saline, pH 7.2                                                                   | Gibco                     | 20012050          |
| InVivoMAb anti-mouse VEGFR-2 Antibody                                                               | Bio X Cell                | BE0060            |
| Anti-Mouse CTLA-4 (Clone 9H10) – Purified in vivo PLATINUM™ Functional Grade                        | Leinco Technologies       | C2841             |
| Anti-Mouse CD279 (PD-1) (Clone RMP1-14) – Purified in vivo PLATINUM™ Functional Grade               | Leinco Technologies       | P372              |
| InVivoMAb anti-mouse Ly6G                                                                           | Bio X Cell                | BE0075-1          |
| InVivoMAb anti-rat Kappa Immunoglobulin Light Chain                                                 | Bio X Cell                | BE0122            |
| InVivoMAb anti-mouse CD40                                                                           | Bio X Cell                | BE0016-2          |
| Foxp3 / Transcription Factor Fixation/Permeabilization                                              | Invitrogen                | 00-5521-00        |
| Anti-Mouse CD32/CD16 – Purified in vivo PLATINUM™ Functional Grade                                  | Leinco Technologies       | C681              |
| Fisherbrand™ Color-Coded Capillary Tubes                                                            | Fisher Scientific         | 22-260950         |
| BD Vacutainer™ Plastic Blood Collection Tubes with Sodium Heparin: Hemogard™                        | Fisher Scientific         | 23-021-017        |
| Red Blood Cell Lysing Buffer Hybri-Max                                                              | Sigma-Aldrich             | R7757-100ML       |
| Tris Buffered Saline with Tween® 20                                                                 | Cell Signaling Technology | 9997              |
| Bovine Serum Albumin                                                                                | Sigma-Aldrich             | A2934-100G        |
| Hypoxyprome Plus Kit                                                                                | Hypoxyprome               | HP2-200Kit        |

|                                                                                         |                          |                   |
|-----------------------------------------------------------------------------------------|--------------------------|-------------------|
| Fluorescein isothiocyanate–dextran<br>average mol wt 2,000,000                          | Sigma-Aldrich            | FD2000S           |
| Histopaque-1119                                                                         | Sigma-Aldrich            | 11191-<br>6X100ML |
| CD8 T cell isolation Kit                                                                | Miltenyi-Biotec          | 130-104-075       |
| eBioscience™ Cell Stimulation<br>Cocktail (plus protein transport<br>inhibitors) (500X) | Thermo Fisher Scientific | 00-4975-93        |
| RNeasy Mini Kit                                                                         | Qiagen                   | 74104             |
| SuperScript™ IV First-Strand<br>Synthesis System                                        | Thermo Fisher Scientific | 18091200          |
| CD11b MicroBeads, human and<br>mouse - lyophilized                                      | Miltenyi-Biotec          | 130-097-142       |
| CellTrace™ CFSE Cell Proliferation<br>Kit, for flow cytometry                           | Thermo Fisher Scientific | C34554            |
| Proteome Profiler Mouse XL Cytokine<br>Array                                            | R&D Systems              | ARY028            |
| Proteome Profiler Mouse Chemokine<br>Array Kit                                          | R&D Systems              | ARY020            |
| Stainless Steel Beads, 5 mm                                                             | Qiagen                   | 69989             |
| Tissue Lyser II                                                                         | Qiagen                   | 85300             |
| Pierce™ BCA Protein Assay Kit                                                           | Thermo Fisher Scientific | 23225             |
| 12-well Corning® Costar® Transwell®,<br>diam. 6.5 mm, pore size 8.0 µm                  | Corning                  | 3422              |
| CountBright™ Absolute Counting<br>Beads                                                 | Thermo Fisher Scientific | C36950            |
| BX471                                                                                   | MedChemExpress           | HY-12080          |
| Mouse CCL9/10/MIP-1 gamma DuoSet<br>ELISA                                               | Biotechne   R&D Systems  | DY463             |
